# Supplementary material
Source: PubMed Central journal article supplement (PMC3394668)
Supplement: NIHMS49110-supplement-S1-S3.pdf [file NIHMS49110-supplement-S1-S3.pdf]

## Supporting Information

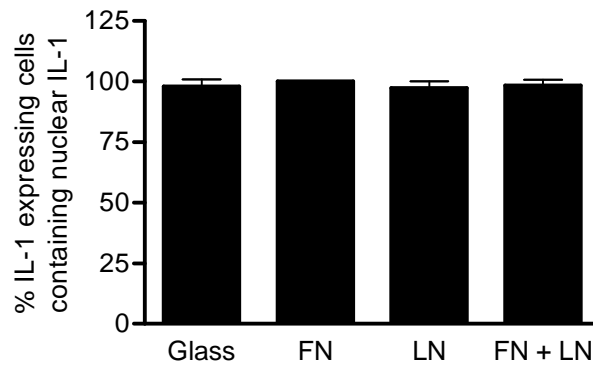

**Figure S1: IL-1 $\alpha$  localization in BV-2 cells is not regulated by adhesion to ECM**

BV-2 cells were seeded at low density ( $1 \times 10^5$  cells/mL) on glass coverslips left uncoated or coated with fibronectin (FN), laminin (LN) or fibronectin and laminin (FN + LN), LPS-treated ( $1 \mu\text{g/mL}$ , 6h), immunostained for IL-1 $\alpha$  and co-stained with DAPI. The proportion of IL-1 $\alpha$ -expressing BV-2 cells containing nuclear IL-1 $\alpha$  was quantified by blind cell counting. Data shown are from  $n = 2$  independent experiments.

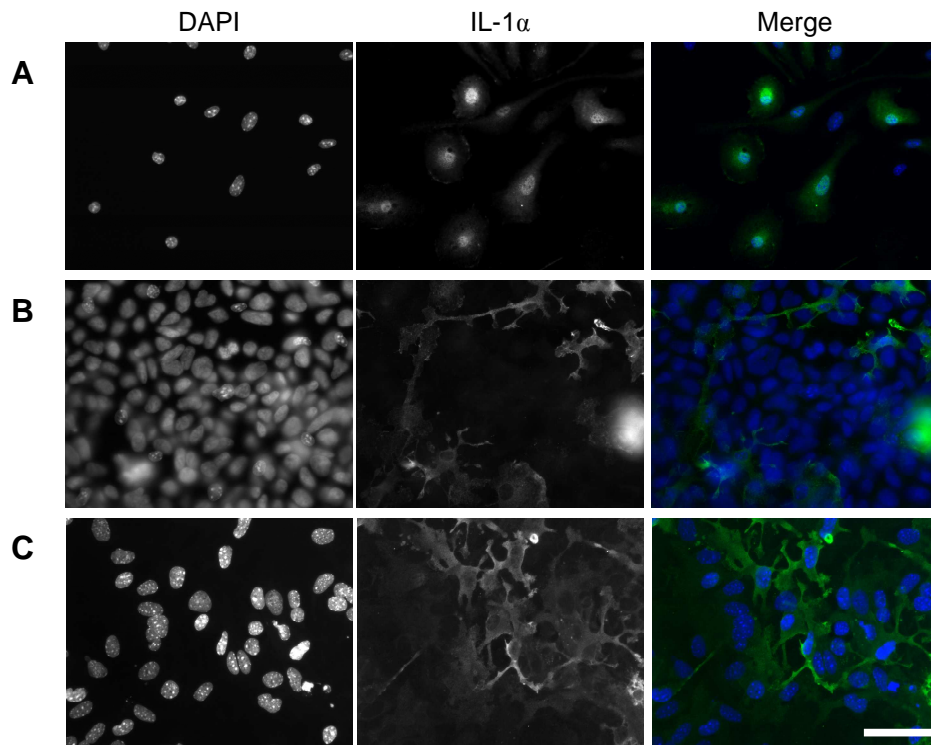

**Figure S2: Local cell density-dependent IL-1 nuclear localization in primary murine microglia**

Widefield images show IL-1 $\alpha$  subcellular localization in LPS (6 hours, 1  $\mu$ g/mL) treated primary murine microglia [cultured as described previously, (31)]. Microglia were cultured alone ( $1 \times 10^5$  cells/mL, **A**), co-cultured with a HEK-293 cell monolayer (**B**), or co-cultured with primary murine astrocytes (**C**). Cells were immunostained for IL-1 $\alpha$  (green) and co-stained with DAPI (blue). Images are of representative fields of view from one of  $n = 2$  (**C**) or  $n = 3$  (**A**, **B**) independent cultures. Scale bar = 40  $\mu$ m.

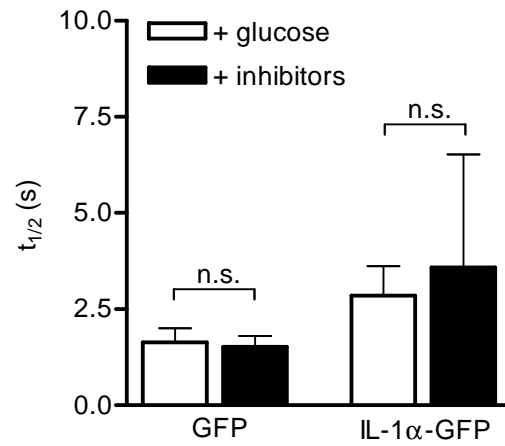

**Figure S3: IL-1 $\alpha$ -GFP cytoplasmic mobility is not affected by ATP-depletion.**

Cytoplasmic FRAP was performed as described previously (11) on GFP- and IL-1 $\alpha$ -GFP-expressing COS-7 cells under normal (+ glucose) or ATP-depleted (+ inhibitors) conditions. The half times for fluorescence recovery ( $t_{1/2}$ ) were measured for  $n = 15$  cells per condition. n.s., no significant change in  $t_{1/2}$ , one way ANOVA with post-hoc Bonferroni multiple comparison analysis.
